# Supplementary material for: Modelling Arctic Lower Tropospheric Ozone: processes controlling seasonal variations
Source: Copernicus journal article supplement (doi:10.5194/egusphere-2024-3750), 2025-01-21
Supplement: Supplementary file 1 [file egusphere-2024-3750-supplement.pdf]

**Supplementary Materials for**

**Modelling Arctic Lower Tropospheric Ozone: processes controlling seasonal variations**

Wanmin Gong et al.

Correspondence: Wanmin Gong ([wanmin.gong@ec.gc.ca](mailto:wanmin.gong@ec.gc.ca))

Figures (SF.1 to SF.10)

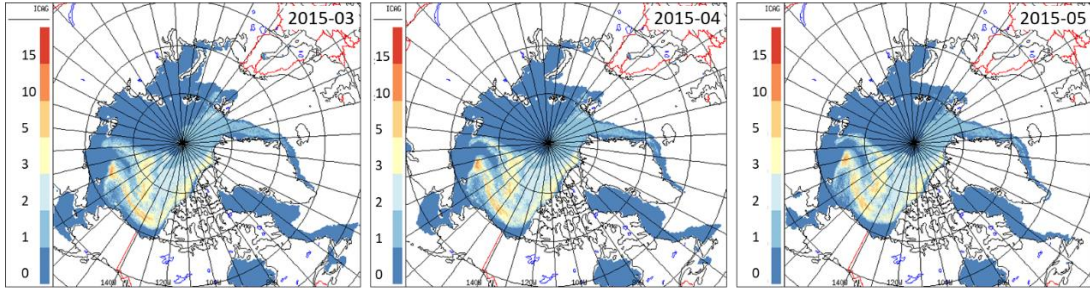

**SF.1** Monthly mean sea ice age (year), for March, April, and May 2015, from the EASE-Grid Sea Ice Age Version 4 dataset used by GEM-MACH.

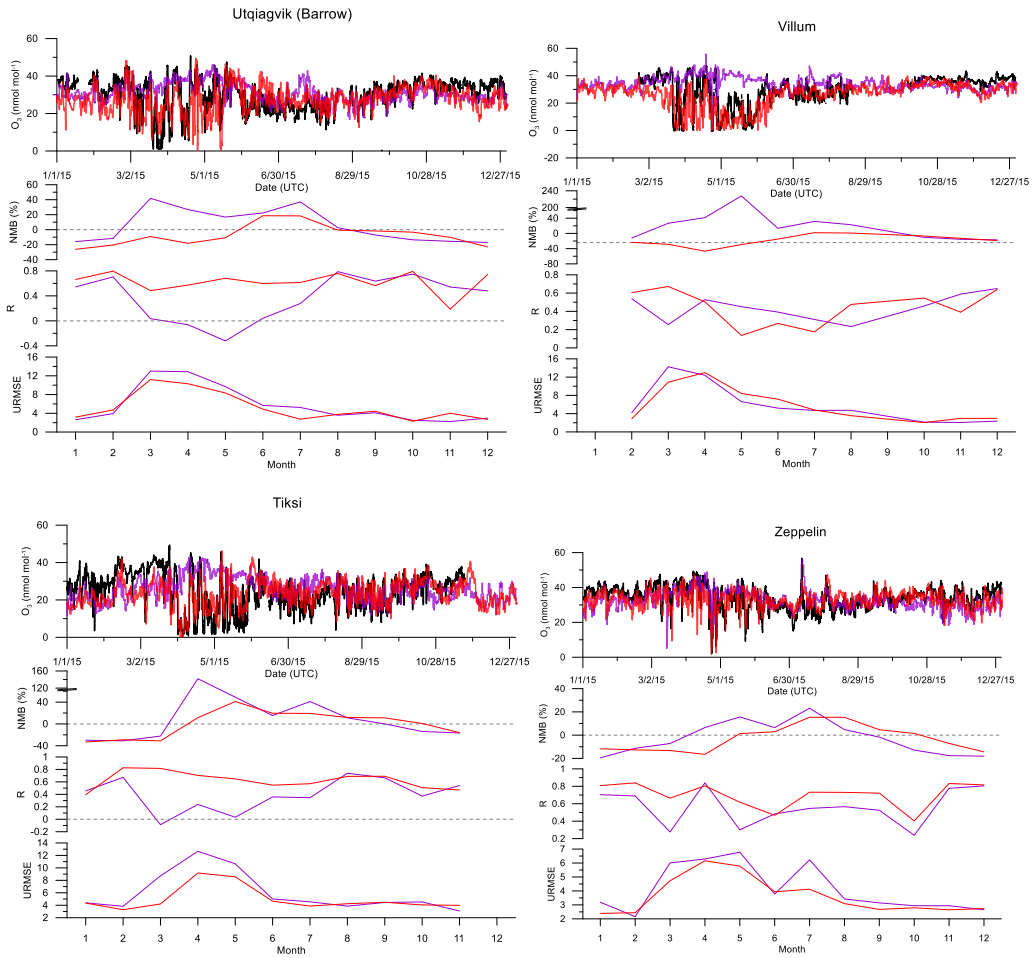

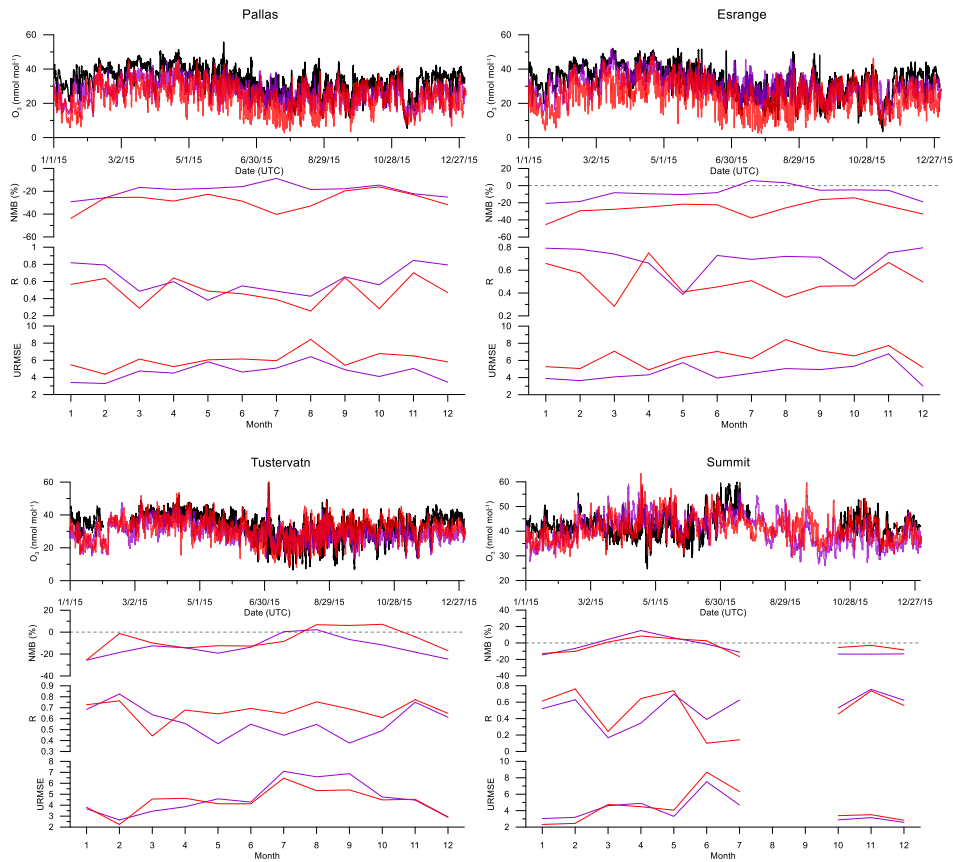

**SF.2** O<sub>3</sub> time series comparisons between models (GEM-MACH and DEHM) and observations at Arctic surface sites accompanied by monthly evaluation statistical metrics (NMB, R, URMSE).

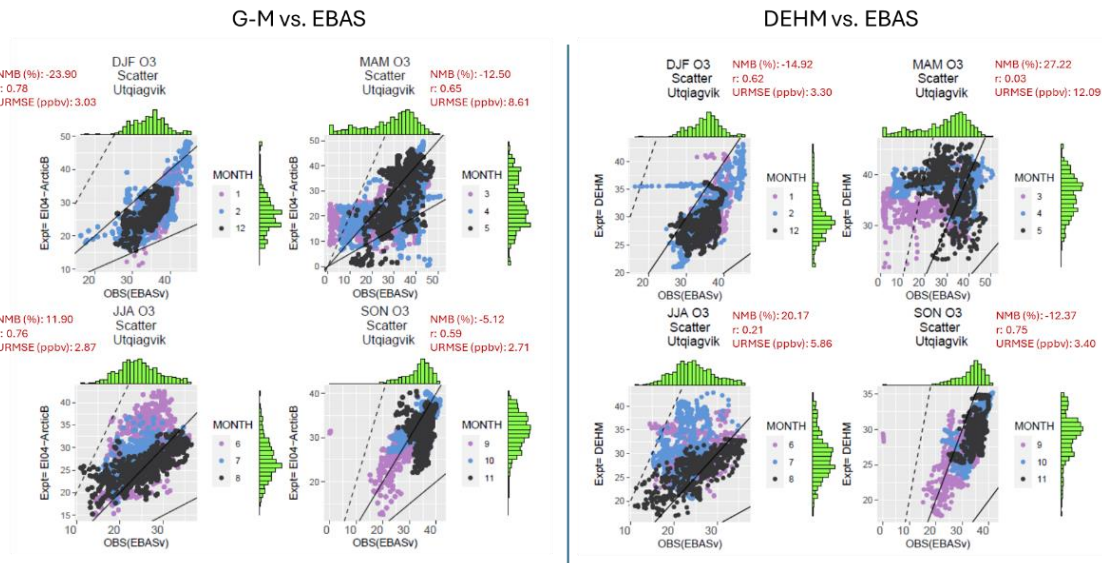

G-M vs. EBAS

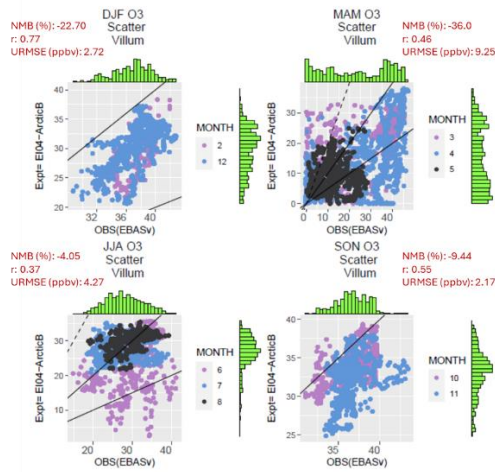

DEHM vs. EBAS

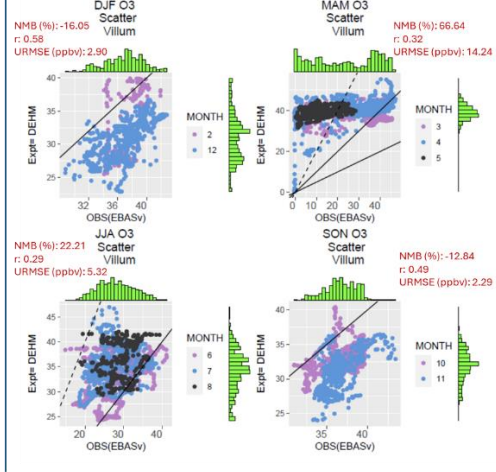

G-M vs. EBAS

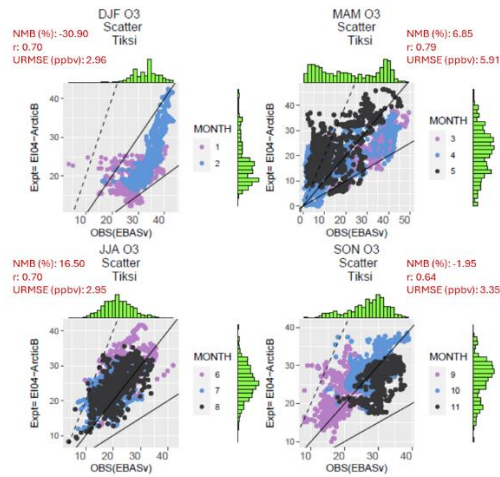

DEHM vs. EBAS

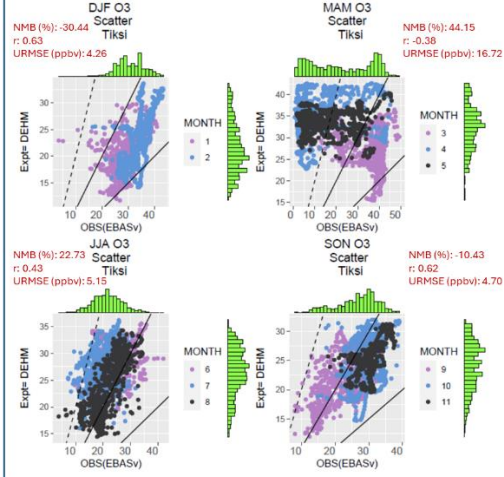

G-M vs. EBAS

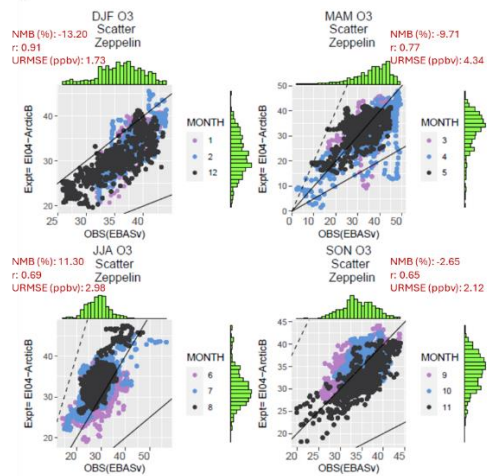

DEHM vs. EBAS

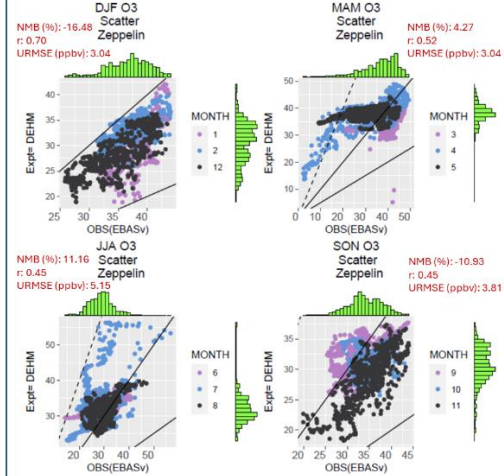

G-M vs. EBAS

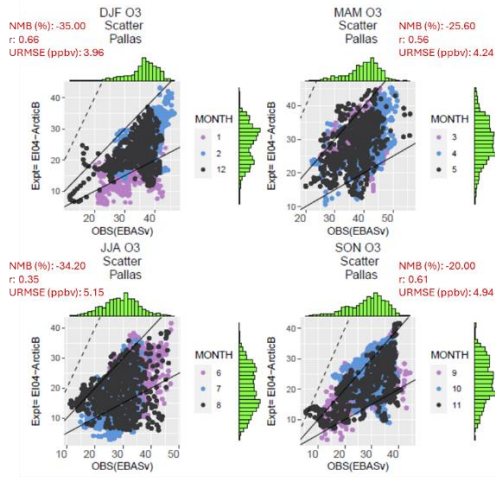

DEHM vs. EBAS

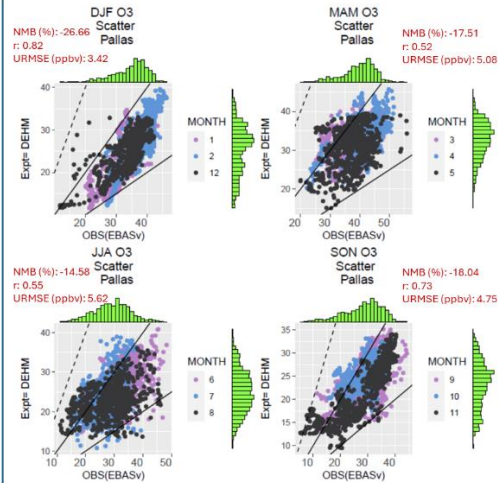

G-M vs. EBAS

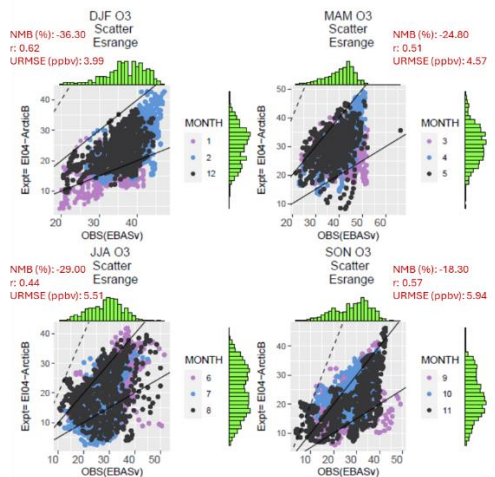

DEHM vs. EBAS

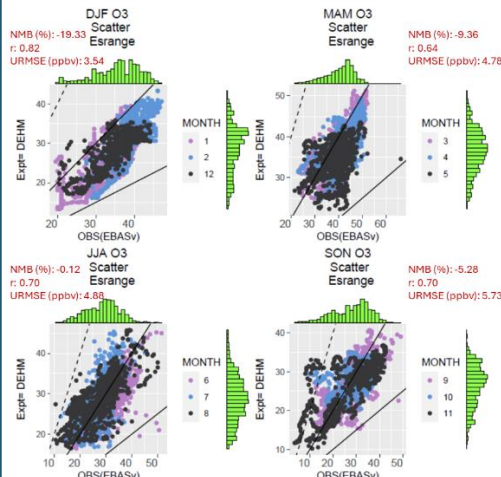

G-M vs. EBAS

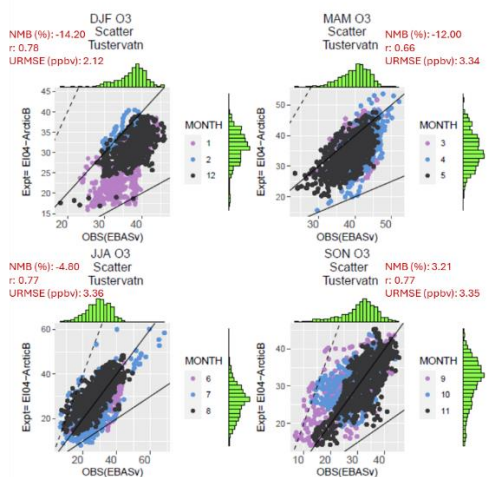

DEHM vs. EBAS

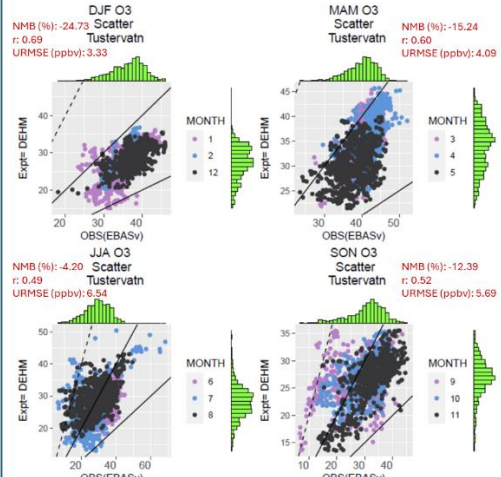

### G-M vs. EBAS

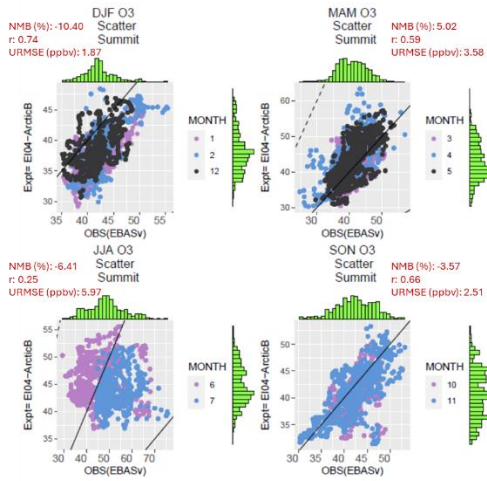

### DEHM vs. EBAS

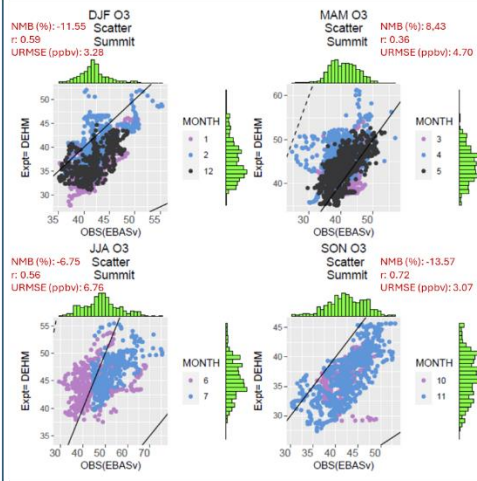

**SF.3** Seasonal statistical evaluation (NMB, R, URMSE) based on 2015 hourly model and observational O<sub>3</sub> data at Arctic surface sites for GEM-MACH and DEHM, respectively.

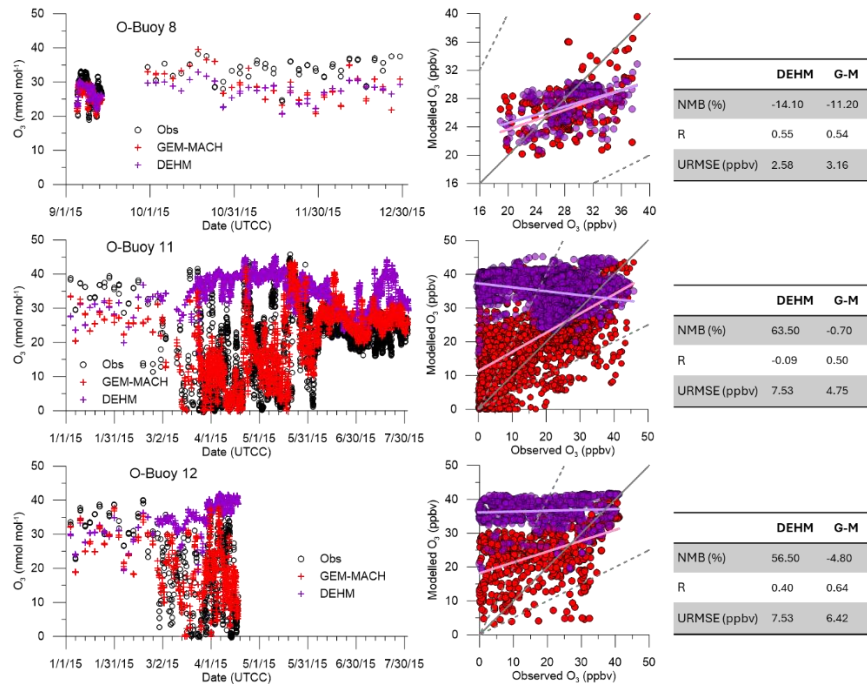

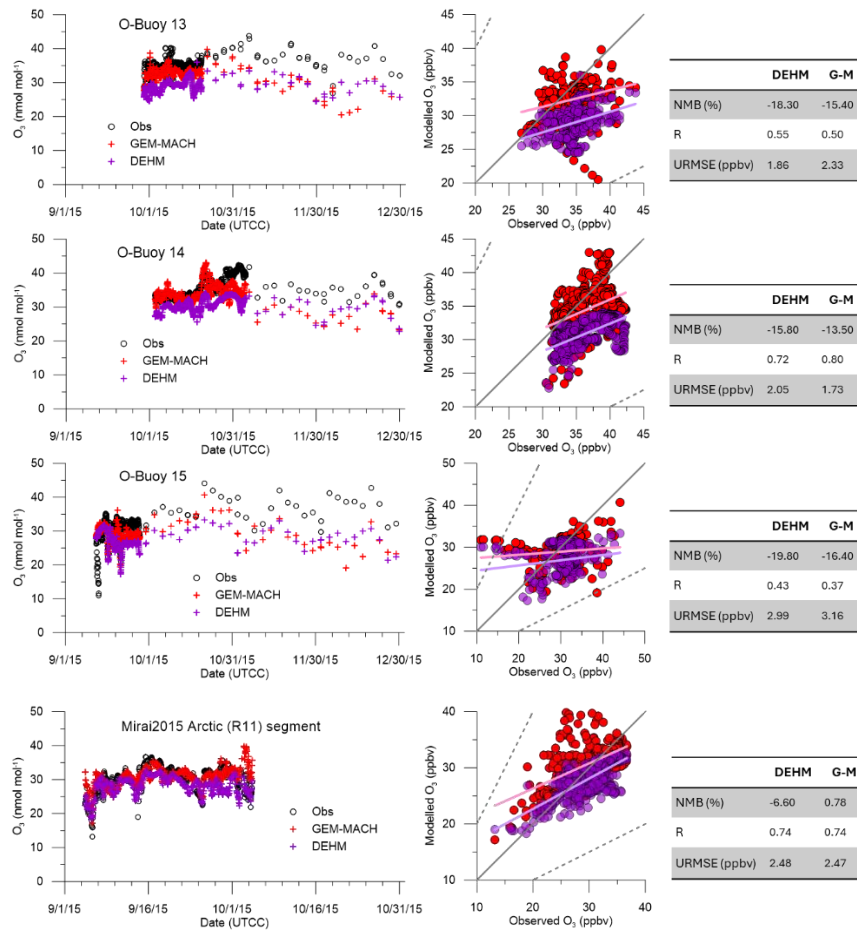

**SF.4** O<sub>3</sub> time series comparison between model and observation for individual O-buoy deployment and Mirai cruise during 2015.

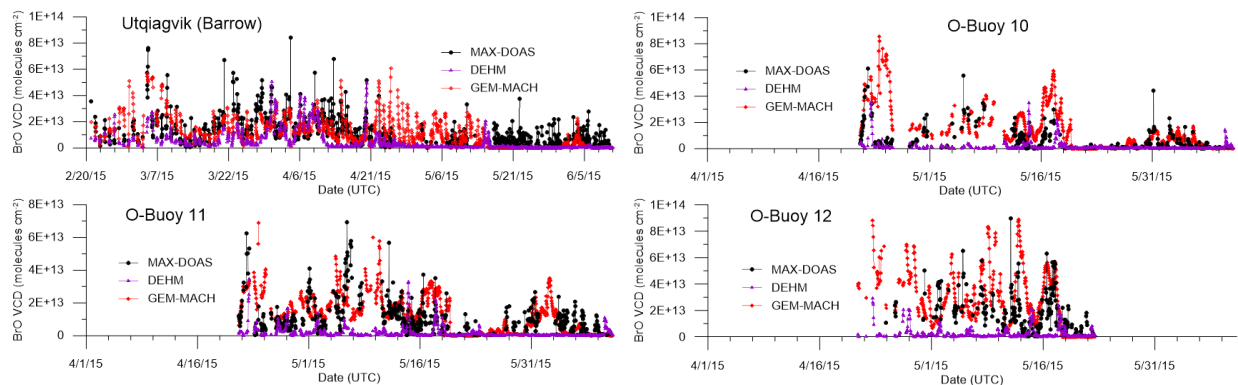

**SF.5** Comparison of modelled BrO (GEM-MACH in red, DEHM in purple) against MAX-DOAS observations (black) at Utqiagvik and on O-buoys during 2015.

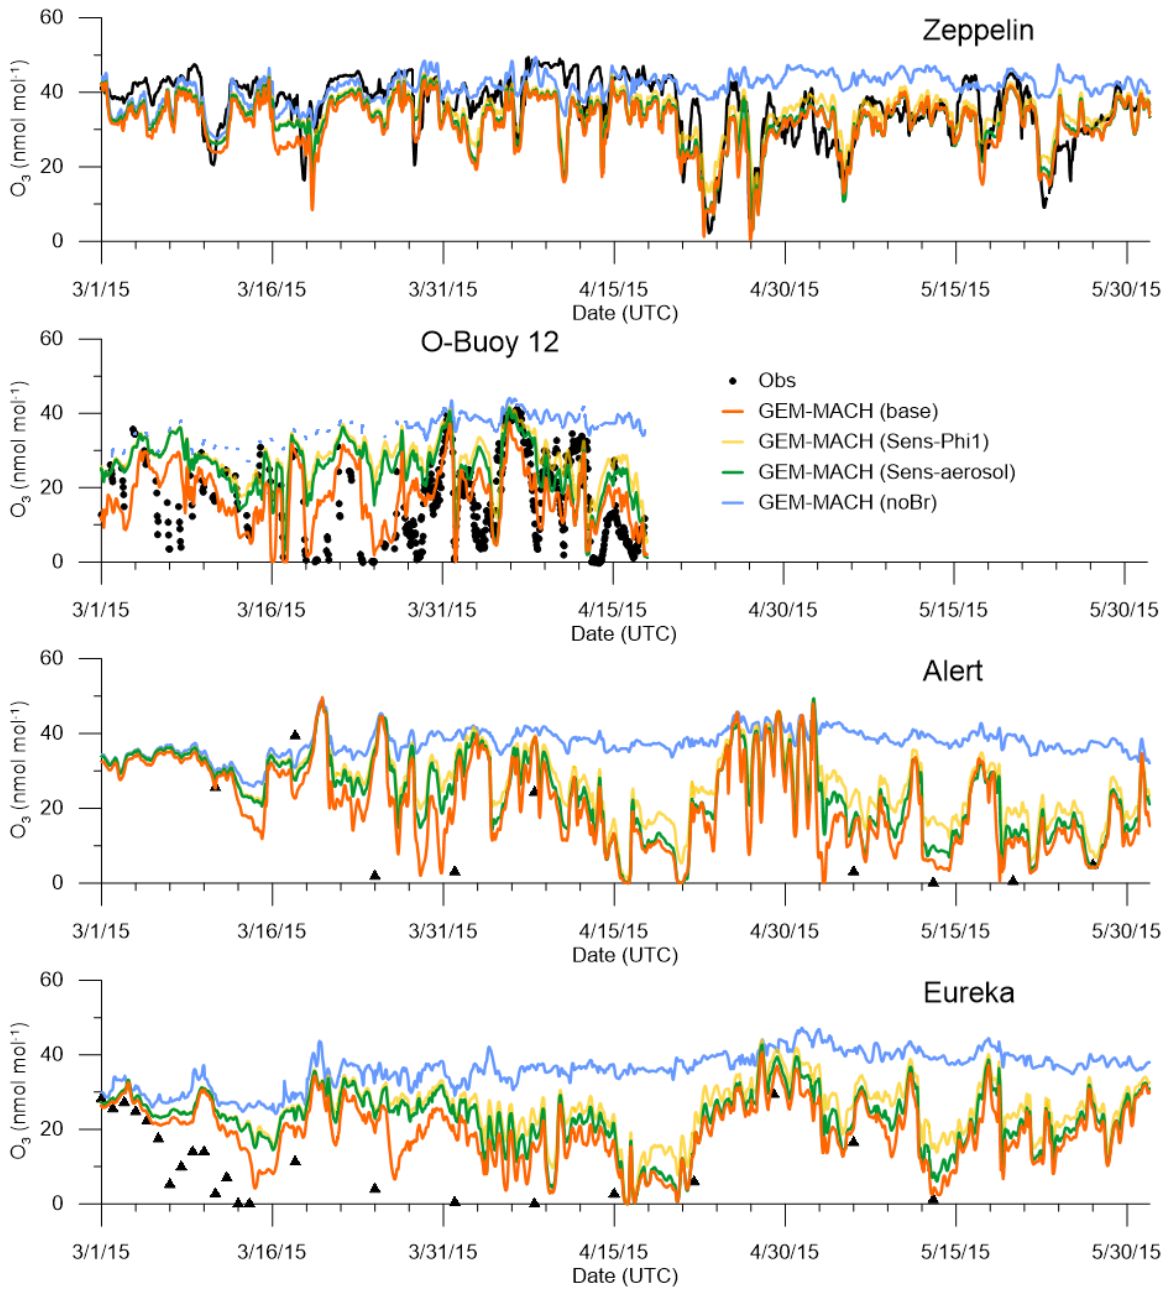

**SF.6** GEM-MACH simulated O<sub>3</sub> time series from the base (red) and sensitivity runs, Sens-Phi1 (turquoise) and Sens-aerosol (green), compared with observations (black) over Beaufort Sea (O-Buoy 12) and at coastal sites: Zeppelin, Alert, and Eureka. Also plotted are the modelled O<sub>3</sub> timeseries from the No-bromine run (blue).



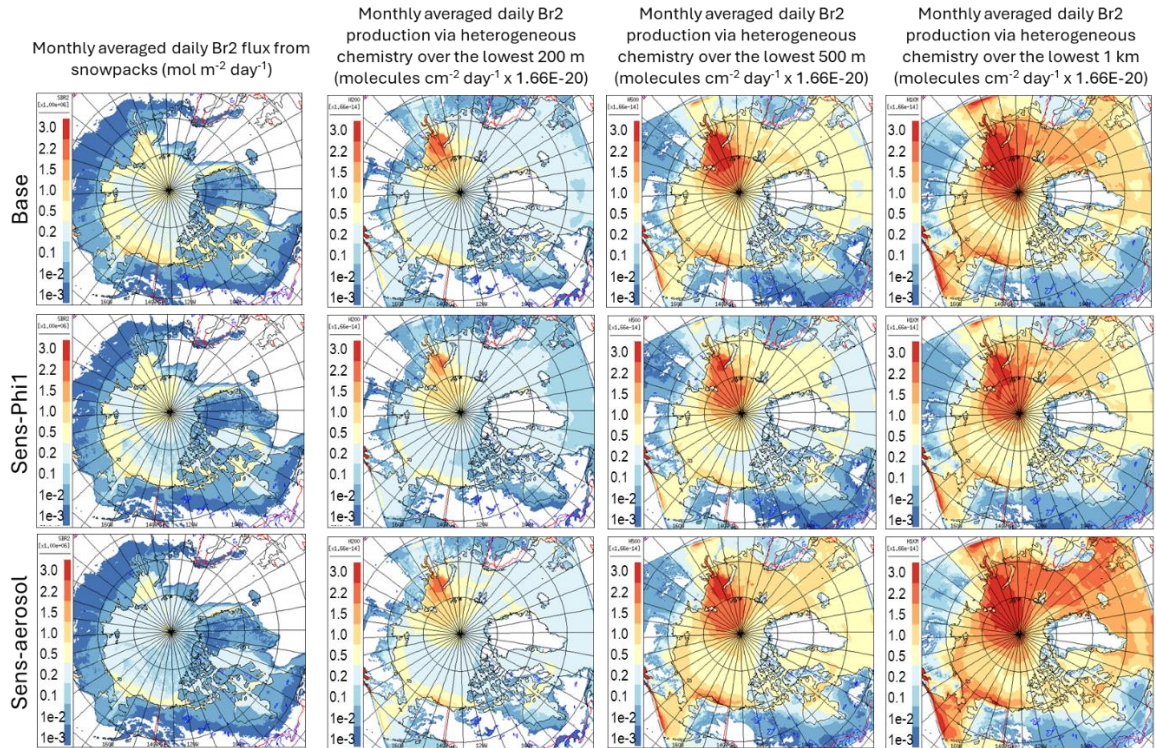

**SF.7** GEM-MACH modelled monthly mean (2015 April) Br<sub>2</sub> daily flux from snowpacks (leftmost column) and Br<sub>2</sub> daily production from aerosol heterogeneous reaction over the lowest 200 m (2nd column from left), the lowest 500 m (3rd column from left), and the lowest 1 km (rightmost column), all in moles m<sup>-2</sup>, from the base (top), Sens-Phi1 (middle), and Sens-aerosol runs (bottom).

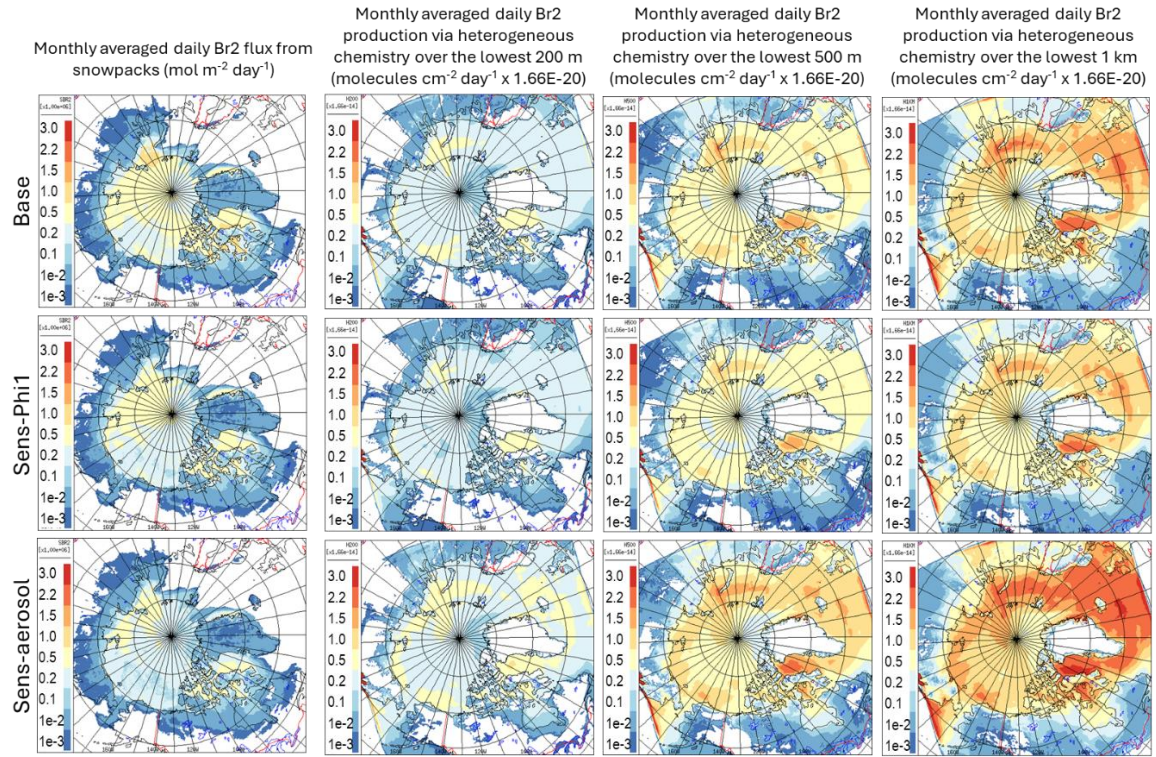

**SF.8** Same as SF.7 but for 2015 May.

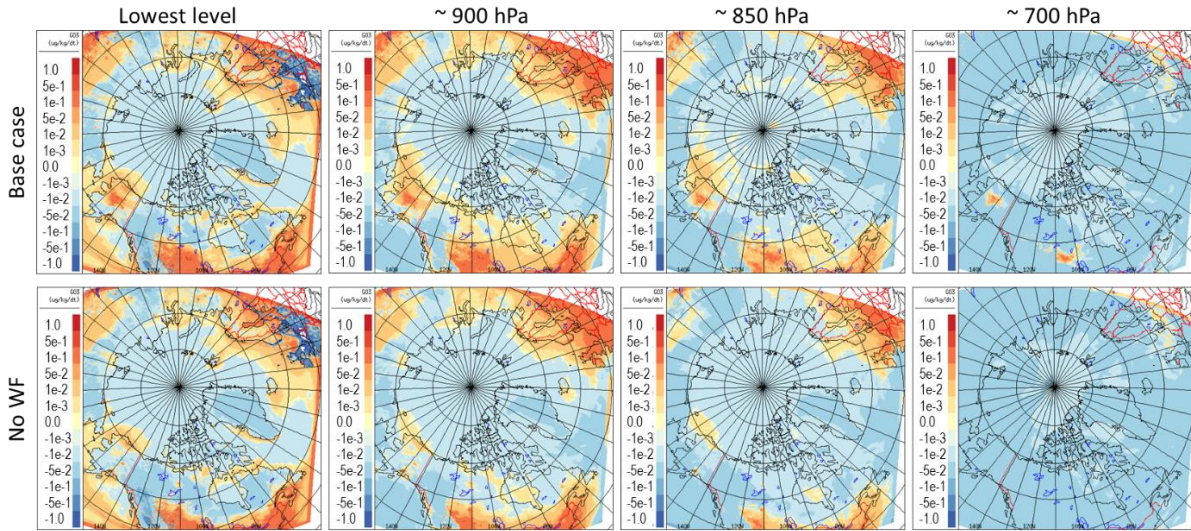

**SF.9** July monthly net O<sub>3</sub> chemical tendency at model levels (from left to right): lowest surface level, ~ 900 hPa, ~850 hPa, and ~ 700 hPa, from the GEM-MACH base annual simulation (with wildfires) (top row) and the GEM-MACH simulation without the wildfire emissions in the model LAM domain (bottom row).

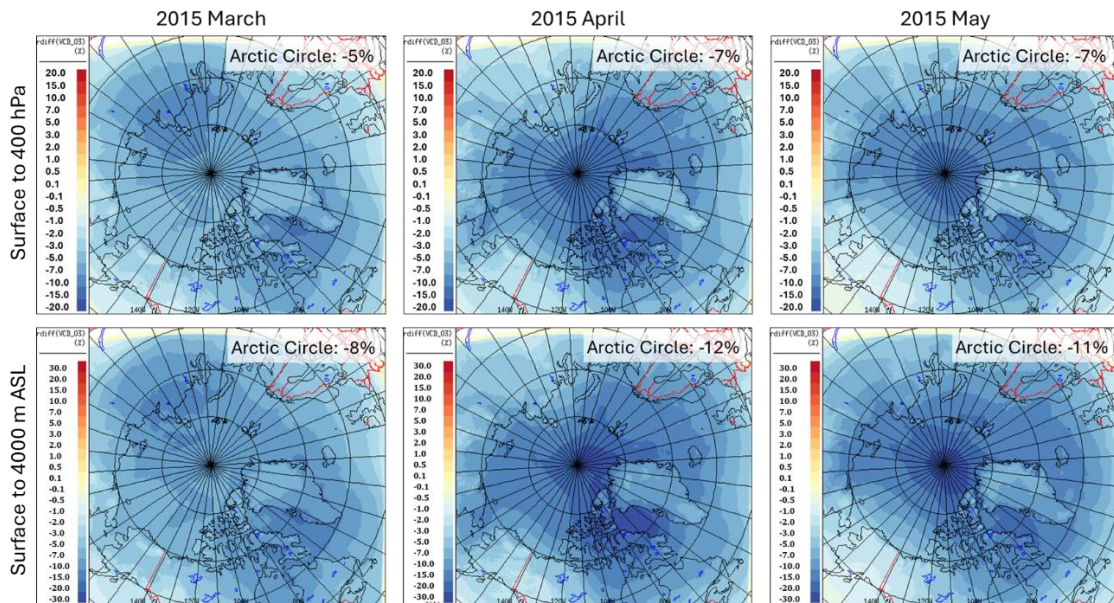

**SF.10** Reduction in monthly mean O<sub>3</sub> partial columns due to snowpack bromine in GEM-MACH, surface to 400 hPa (top row) and surface to 4000 m ASL (bottom row), shown in relative difference (%):  $(\text{Base-noBr})/\text{noBr} \times 100$ . The corresponding reductions in pan-Arctic (> 66.5°N; “Arctic Circle”) integrated monthly mean O<sub>3</sub> partial columns due to snowpack bromine are indicated in each plot.
